# Supplementary material
Source: PubMed Central journal article supplement (PMC8389738)
Supplement: NIHMS1707874-supplement-Supplementary.pdf [file NIHMS1707874-supplement-Supplementary.pdf]

| <b>Model</b>                  | <b>AIC (Linear/Non-linear)</b> | <b>BIC (Linear/Non-linear)</b> |
|-------------------------------|--------------------------------|--------------------------------|
| Climate prenatal for kids 0-1 | 50787.82 / 50790.68            | 50790.68 / 50910.15            |
| Climate 0-1 for kids 1-2      | 44072.64 / 44079.06            | 44209.63 / 44246.49            |
| Climate 0-2 for kids 2-3      | 43584.95 / 43585.83            | 43720.11 / 43751.04            |
| Climate 0-3 for kids 3-4      | 39891.32 / 39864.59            | 40026.51 / 40029.82            |
| Climate 0-4 for kids 4-5      | 39303.52 / 39296.96            | 39439.16 / 39462.75            |

**Supplementary Table 1: AIC/BIC scores comparing linear and non-linear weather variable specifications**

| Variable                  | HAZ (B)     |       |             |        |             |        |             |     |             |     |
|---------------------------|-------------|-------|-------------|--------|-------------|--------|-------------|-----|-------------|-----|
|                           | 0-1         | 1-2   | 2-3         | 3-4    | 4-5         |        |             |     |             |     |
| Rain prenatal             | 0.016       | 0.038 | **          | 0.029  | -0.011      | -0.031 | *           |     |             |     |
| Temp prenatal             | -0.066      | +     | -0.006      | -0.007 | 0.013       | 0.024  |             |     |             |     |
| Rain 0-1                  | --          | 0.008 | 0.065       | ***    | 0.028       | 0.018  |             |     |             |     |
| Temp 0-1                  | --          | 0.012 | 0           | -0.008 | 0.05        | *      |             |     |             |     |
| Rain 1-2                  | --          | --    | -0.001      | 0.025  | +           | -0.004 |             |     |             |     |
| Temp 1-2                  | --          | --    | -0.026      | +      | 0.006       | 0.029  |             |     |             |     |
| Rain 2-3                  | --          | --    | --          | 0.017  | 0.052       | *      |             |     |             |     |
| Temp 2-3                  | --          | --    | --          | 0.032  | 0.027       |        |             |     |             |     |
| Rain 3-4                  | --          | --    | --          | --     | 0.02        |        |             |     |             |     |
| Temp 3-4                  | --          | --    | --          | --     | 0.038       | +      |             |     |             |     |
| Child Age                 | -0.039      | ***   | -0.025      | ***    | -0.013      | ***    | 0.011       | **  | -0.009      | **  |
| Female                    | 0.155       | ***   | 0.129       | **     | 0.068       | ***    | 0.09        | *** | 0.067       | *** |
| Indigenous                | -0.222      | *     | -0.205      | **     | -0.205      | *      | -0.205      | **  | -0.16       | *   |
| Rural                     | -0.003      |       | -0.079      |        | -0.08       |        | -0.123      | +   | -0.113      | *   |
| Maternal Age              | -0.001      |       | 0.002       |        | 0.008       | **     | 0.005       | **  | 0.006       | *** |
| <b>Maternal Education</b> |             |       |             |        |             |        |             |     |             |     |
| None                      | -0.13       | +     | -0.21       | **     | -0.232      | *      | -0.13       | +   | -0.184      | **  |
| Primary                   | -           |       | -           |        | -           |        | -           |     | -           |     |
| Secondary                 | 0.16        | **    | 0.221       | ***    | 0.27        | ***    | 0.309       | *** | 0.259       | *** |
| Higher                    | 0.272       | ***   | 0.43        | ***    | 0.435       | ***    | 0.48        | *** | 0.46        | *** |
| Household size            | -0.024      | ***   | -0.035      | ***    | -0.048      | ***    | -0.041      | *** | -0.046      | *** |
| <b>Wealth Quintile</b>    |             |       |             |        |             |        |             |     |             |     |
| 1                         | -0.341      | ***   | -0.333      | ***    | -0.462      | ***    | -0.447      | *** | -0.416      | *** |
| 2                         | -0.142      | ***   | -0.184      | ***    | -0.255      | ***    | -0.199      | *** | -0.228      | *** |
| 3                         | -           |       | -           |        | -           |        | -           |     | -           |     |
| 4                         | -0.051      | +     | 0.169       | **     | 0.257       | ***    | 0.324       | *** | 0.249       | *** |
| 5                         | 0.099       | *     | 0.338       | ***    | 0.411       | ***    | 0.548       | *** | 0.537       | *** |
| Time                      | -0.002      | ***   | 0.00        |        | 0.002       | ***    | 0.002       | *** | 0.002       | *** |
| n                         | 15,452      |       | 13,569      |        | 13,484      |        | 13,501      |     | 13,844      |     |
| Joint test of climate     | <b>1.73</b> |       | <b>5.02</b> | **     | <b>5.95</b> | ***    | <b>1.81</b> |     | <b>4.39</b> | **  |

+ p<0.10, \* p<0.05, \*\* p<0.01, \*\*\* p<0.001, - reference

Note: Models also controlled for Census-based regions (departments)

**Supplementary Table 2: Effects of climate anomalies on growth with exposure disaggregated by each year of life**

| Variable                     | HAZ (B)     |          |             |            |             |          |             |          |              |            |
|------------------------------|-------------|----------|-------------|------------|-------------|----------|-------------|----------|--------------|------------|
|                              | Age 0-1     |          | Age 1-2     |            | Age 2-3     |          | Age 3-4     |          | Age 4-5      |            |
| Prenatal Rain                | 0.022       | +        | 0.038       | **         | 0.014       |          | -0.011      |          | -0.035       | *          |
| Prenatal Temp                | -0.076      | *        | 0.002       |            | -0.011      |          | 0.027       | +        | 0.028        |            |
| Postnatal Rain               | --          |          | 0.008       |            | 0.053       | *        | 0.06        | +        | 0.069        | ***        |
| Postnatal Temp               | --          |          | 0.026       | +          | -0.003      |          | 0.001       |          | 0.066        | *          |
| Child Age                    | -0.04       | ***      | -0.027      | ***        | -0.013      | ***      | 0.016       | ***      | -0.01        | **         |
| Female                       | 0.142       | ***      | 0.134       | **         | 0.083       | ***      | 0.08        | ***      | 0.086        | ***        |
| Indigenous                   | -0.231      | +        | -0.193      | *          | -0.195      | +        | -0.175      | +        | -0.158       | +          |
| Rural                        | -0.031      |          | -0.133      | *          | -0.114      |          | -0.184      | *        | -0.152       | *          |
| Maternal Age                 | -0.001      |          | 0.001       |            | 0.007       | *        | 0.005       | **       | 0.006        | ***        |
| <b>Maternal Education</b>    |             |          |             |            |             |          |             |          |              |            |
| None                         | -0.143      | *        | -0.197      | **         | -0.233      | **       | -0.118      |          | -0.179       | *          |
| Primary                      | -           |          | -           |            | -           |          | -           |          | -            |            |
| Secondary                    | 0.149       | **       | 0.17        | ***        | 0.224       | ***      | 0.265       | ***      | 0.253        | ***        |
| Higher                       | 0.267       | ***      | 0.358       | ***        | 0.385       | ***      | 0.449       | ***      | 0.421        | ***        |
| Household size               | -0.031      | ***      | -0.038      | ***        | -0.053      | ***      | -0.043      | ***      | -0.046       | ***        |
| <b>Wealth Quintile</b>       |             |          |             |            |             |          |             |          |              |            |
| 1                            | -0.355      | ***      | -0.359      | ***        | -0.47       | ***      | -0.467      | ***      | -0.403       | ***        |
| 2                            | -0.134      | **       | -0.212      | ***        | -0.247      | ***      | -0.196      | ***      | -0.232       | ***        |
| 3                            | -           |          | -           |            | -           |          | -           |          | -            |            |
| 4                            | -0.077      | +        | 0.148       | **         | 0.254       | ***      | 0.303       | ***      | 0.238        | ***        |
| 5                            | 0.093       | +        | 0.336       | ***        | 0.375       | **       | 0.524       | ***      | 0.536        | ***        |
| Time                         | -0.002      | ***      | 0.00        |            | 0.002       | ***      | 0.002       | ***      | 0.002        | ***        |
| n                            | 11,651      |          | 10,442      |            | 10,584      |          | 10,823      |          | 11,468       |            |
| <b>Joint test of climate</b> | <b>2.68</b> | <b>+</b> | <b>8.66</b> | <b>***</b> | <b>2.97</b> | <b>*</b> | <b>4.09</b> | <b>*</b> | <b>12.66</b> | <b>***</b> |

+ p<0.10, \* p<0.05, \*\* p<0.01, \*\*\* p<0.001, - reference

Note: Models also controlled for Census-based regions (departments)

**Supplementary Table 3: HAZ and climate exposure across childhood while restricting the sample to children who have not moved in the past 5 years**

| Variable Interactions      | Prenatal climate for 0-1 |          | Climate 0-1 for 1-2 |        |                |        | Climate 0-2 for 2-3 |         |                 |         | Climate 0-3 for 3-4 |         |                 |        | Climate 0-4 for 4-5 |         |                 |         |
|----------------------------|--------------------------|----------|---------------------|--------|----------------|--------|---------------------|---------|-----------------|---------|---------------------|---------|-----------------|--------|---------------------|---------|-----------------|---------|
|                            |                          |          | Prenatal            |        | Postnatal      |        | Prenatal            |         | Postnatal       |         | Prenatal            |         | Postnatal       |        | Prenatal            |         | Postnatal       |         |
|                            | Rain                     | Temp.    | Rain                | Temp.  | Rain           | Temp.  | Rain                | Temp.   | Rain            | Temp.   | Rain                | Temp.   | Rain            | Temp.  | Rain                | Temp.   | Rain            | Temp.   |
| <i>Indigenous</i>          |                          |          |                     |        |                |        |                     |         |                 |         |                     |         |                 |        |                     |         |                 |         |
| No                         | 0.013                    | -0.083*  | 0.040**             | -0.019 | 0.013          | 0.000  | 0.0.024             | -0.005  | 0.052*          | 0.000   | -0.000              | 0.013   | 0.049           | 0.005  | -0.029+             | 0.021   | 0.056*          | 0.079** |
| Yes                        | 0.037                    | 0.052    | 0.021               | 0.022  | -0.035         | 0.08** | 0.058               | -0.045  | 0.051           | -0.088+ | -0.08**             | 0.043   | 0.050           | -0.018 | -0.063              | 0.051   | 0.022           | 0.032   |
| Joint test of interactions | <b>3.33+</b>             |          | <b>4.26**</b>       |        | <b>4.26**</b>  |        | <b>3.47*</b>        |         | <b>3.47*</b>    |         | <b>2.86*</b>        |         | <b>2.86*</b>    |        | <b>4.94**</b>       |         | <b>4.94**</b>   |         |
| <i>Area</i>                |                          |          |                     |        |                |        |                     |         |                 |         |                     |         |                 |        |                     |         |                 |         |
| Urban                      | 0.024                    | -0.111** | 0.042*              | -0.009 | 0.018          | 0.002  | 0.002               | 0.011   | 0.065**         | -0.000  | -0.008              | 0.005   | 0.088*          | -0.004 | -0.017              | 0.021   | 0.069**         | 0.072*  |
| Rural                      | 0.009                    | 0.006    | 0.033*              | -0.006 | -0.009         | 0.025  | 0.053               | -0.031  | 0.031           | -0.039  | -0.014              | 0.029   | -0.011          | -0.003 | -0.056*             | 0.024   | 0.014           | 0.060+  |
| Joint test of interactions | <b>9.18**</b>            |          | <b>0.52</b>         |        | <b>0.52</b>    |        | <b>1.58</b>         |         | <b>1.58</b>     |         | <b>3.57*</b>        |         | <b>3.57*</b>    |        | <b>2.89*</b>        |         | <b>2.89*</b>    |         |
| <i>Wealth</i>              |                          |          |                     |        |                |        |                     |         |                 |         |                     |         |                 |        |                     |         |                 |         |
| Quintile 1                 | 0.002                    | -0.022   | 0.005               | -0.005 | -0.016         | 0.042  | 0.083*              | -0.041  | -0.006          | -0.033  | -0.016              | 0.044   | -0.027          | 0.005  | -0.023              | 0.051+  | 0.020           | 0.109** |
| Quintile 2                 | 0.044+                   | -0.001   | 0.031+              | 0.009  | 0.049*         | 0.029  | -0.002              | 0.007   | 0.058*          | 0.035   | -0.047              | 0.043+  | 0.010           | -0.035 | -0.019              | -0.010  | 0.006           | 0.002   |
| Quintile 3                 | -0.016                   | -0.17*** | 0.044**             | -0.05+ | 0.017          | -0.003 | -0.034              | 0.006   | 0.075**         | -0.023  | 0.043               | -0.029  | 0.075*          | -0.022 | -0.036              | 0.032   | 0.091**         | 0.037   |
| Quintile 4                 | 0.005                    | -0.088   | 0.038               | 0.002  | 0.030          | -0.034 | 0.049               | -0.017  | 0.114**         | -0.034  | -0.001              | -0.044  | 0.091*          | 0.018  | -0.011              | -0.034  | 0.055*          | 0.060+  |
| Quintile 5                 | 0.073+                   | -0.061   | 0.11**              | -0.018 | -0.04*         | -0.004 | -0.016              | 0.056   | 0.050           | -0.077  | -0.029              | 0.064** | 0.133**         | 0.024  | -0.078**            | 0.069** | 0.17***         | 0.036   |
| Joint test of interactions | <b>6.93***</b>           |          | <b>11.0***</b>      |        | <b>11.0***</b> |        | <b>12.03***</b>     |         | <b>12.03***</b> |         | <b>35.39***</b>     |         | <b>35.39***</b> |        | <b>13.57***</b>     |         | <b>13.57***</b> |         |
| <i>Education</i>           |                          |          |                     |        |                |        |                     |         |                 |         |                     |         |                 |        |                     |         |                 |         |
| None                       | -0.020                   | 0.043    | 0.005               | 0.12+  | -0.019         | 0.037  | 0.131+              | -0.048  | -0.155+         | -0.120  | 0.063+              | 0.051   | 0.004           | 0.008  | 0.023               | -0.049  | 0.014           | 0.059   |
| Primary                    | 0.010                    | -0.060   | 0.022               | -0.036 | 0.013          | 0.036  | 0.039               | -0.041+ | 0.039           | -0.013  | -0.048+             | 0.011   | -0.016          | -0.025 | -0.021              | 0.026   | -0.014          | 0.046   |
| Secondary                  | 0.019                    | -0.073*  | 0.037               | -0.005 | 0.010          | 0.026  | 0.010               | -0.005  | 0.10***         | 0.004   | 0.001               | 0.015   | 0.102+          | -0.006 | -0.058**            | 0.043+  | 0.10***         | 0.072*  |
| Higher                     | 0.030                    | -0.085*  | 0.068**             | 0.012  | 0.009          | -0.065 | -0.041              | 0.083*  | 0.033           | -0.038  | 0.022               | 0.003   | 0.056*          | 0.048  | -0.028              | 0.002   | 0.070+          | 0.094*  |
| Joint test of interactions | <b>0.79</b>              |          | <b>9.17***</b>      |        | <b>9.17***</b> |        | <b>10.79***</b>     |         | <b>10.79***</b> |         | <b>8.26***</b>      |         | <b>8.26***</b>  |        | <b>6.12***</b>      |         | <b>6.12***</b>  |         |
| <i>Indig * Area</i>        |                          |          |                     |        |                |        |                     |         |                 |         |                     |         |                 |        |                     |         |                 |         |
| Non-indig urban            | 0.019                    | -0.11**  | 0.041*              | -0.006 | 0.015          | 0.002  | -0.003              | 0.009   | 0.069**         | -0.004  | -0.005              | 0.006   | 0.084*          | 0.005  | -0.019              | 0.019   | 0.069**         | 0.075*  |
| Non-indig rural            | -0.013                   | 0.074*   | -0.005              | -0.018 | -0.009         | -0.004 | 0.065*              | -0.031  | -0.044          | 0.002   | 0.007               | 0.019   | -0.10*          | 0.005  | -0.029              | 0.004   | -0.040          | 0.007   |
| Indig urban                | 0.35*                    | -0.265   | 0.038               | -0.059 | 0.125          | 0.030  | 0.283*              | 0.034   | -0.318*         | 0.136   | -0.208              | 0.078   | -0.147          | -0.186 | 0.074               | 0.152*  | -0.137          | -0.079  |
| Indig rural                | -0.35*                   | 0.393    | -0.055              | 0.117  | -0.18+         | 0.056  | -0.308*             | -0.069  | 0.364*          | -0.248* | 0.136               | -0.057  | 0.209           | 0.191  | -0.105+             | -0.139  | 0.086           | 0.027   |
| Joint test of interactions | <b>4.12**</b>            |          | <b>6.11***</b>      |        | <b>6.11***</b> |        | <b>12.95***</b>     |         | <b>12.95***</b> |         | <b>4.06**</b>       |         | <b>4.06**</b>   |        | <b>6.81***</b>      |         | <b>6.81***</b>  |         |

+ p<0.10, \* p<0.05, \*\* p<0.01, \*\*\* p<0.001

Supplementary Table 4: Climate by sociodemographic interactions across all age intervals
